# Supplementary material
Source: PubMed Central journal article supplement (PMC10710035)
Supplement: NIHMS1947592-supplement-Supplementary_Material.pdf [file NIHMS1947592-supplement-Supplementary_Material.pdf]

## **SUPPLEMENTARY**

### **A phase 1 study of veliparib (ABT-888) plus weekly carboplatin and paclitaxel in advanced solid malignancies, with an expansion cohort in triple negative breast cancer (TNBC) (ETCTN 8620)**

Monica K. Malhotra\*, Shalu Pahuja\*, Brian Kiesel, Leonard J. Appleman, Fei Ding, Yan Lin, Hussein A. Tawbi, Ronald G. Stoller, James J. Lee, Chandra P. Belani, Alice P. Chen, Vincent L. Giranda, Stacie Peacock Shepherd, Leisha A. Emens, S. Percy Ivy, Edward Chu, Jan H. Beumer, Shannon Puhalla

\* Co-first author

#### Corresponding Authors:

Jan H. Beumer, PharmD, PhD, DABT  
UPMC Hillman Cancer Center  
Room G27E, Hillman Research Pavilion  
5117 Centre Avenue, Pittsburgh, PA 15213-1863, USA  
Tel.: +1-412-623-3216  
Email: beumerj@gmail.com

Shannon Puhalla, MD  
UPMC Magee Women's Hospital  
300 Halket Street  
Pittsburgh, PA 15213  
Email: puhallasl@upmc.edu

**Suppl. Table 1. Mean (standard deviation) pharmacokinetic parameters of veliparib at steady-state in the presence of carboplatin and paclitaxel.**

| Dose (mg) (N) | C <sub>max</sub> (ng/mL) | C <sub>max</sub> /Dose (ng/mL / mg) | T <sub>max</sub> (h) | AUC <sub>0-12</sub> (µg•h/mL) | AUC <sub>0-12</sub> /Dose (ng•h/mL / mg) | T <sub>1/2</sub> (h)   | CL/F (L/h)              |
|---------------|--------------------------|-------------------------------------|----------------------|-------------------------------|------------------------------------------|------------------------|-------------------------|
| 50 (3)        | 424 (122)                | 8.47 (2.43)                         | 1.33 (0.58)          | 3.10 (1.35)                   | 62.0 (26.9)                              | 7.1 (6.1)              | 19.9 (11.0)             |
| 100 (3)       | 641 (251)                | 6.41 (2.51)                         | 3.00 (1.73)          | 4.88 (0.88) <sup>a</sup>      | 48.8 (8.9) <sup>a</sup>                  | 3.9 (0.2) <sup>a</sup> | 20.8 (3.8) <sup>a</sup> |
| 150 (18)      | 1,087 (407)              | 7.25 (2.72)                         | 1.92 (1.13)          | 6.90 (3.56) <sup>a</sup>      | 46.0 (23.7) <sup>a</sup>                 | 4.5 (1.5) <sup>a</sup> | 25.2 (8.6) <sup>a</sup> |
| 200 (4)       | 2,403 (717)              | 12.0 (3.6)                          | 1.50 (0.58)          | 14.4 (3.9) <sup>b</sup>       | 71.9 (19.3) <sup>b</sup>                 | 4.4 (1.8) <sup>b</sup> | 14.4 (3.9) <sup>b</sup> |
| All (28)      |                          | 7.97 (3.17)                         | 1.91 (1.13)          |                               | 50.4 (23.4) <sup>c</sup>                 | 4.8 (2.4) <sup>c</sup> | 23.2 (8.7) <sup>c</sup> |

AUC<sub>0-12</sub> beyond the last time point sampled had a median extrapolated portion of 17.8% (range 1.56-20.7%).

a: 1 patient not available for parameter evaluation due to insufficient time points.

b: 2 patients not available for parameter evaluation due to insufficient time points.

c: 3 patients not available for parameter evaluation due to insufficient time points.

**Suppl. Table 2. Carboplatin PK. Mean (standard deviation) pharmacokinetic parameters of ultrafilterable carboplatin (target dose AUC 2) in the presence of veliparib.**

| Veliparib Dose (mg) (N) | C <sub>max</sub> (µg/mL) | AUC <sub>0-∞</sub> (mg•min/mL) | T <sub>1/2</sub> (h) |
|-------------------------|--------------------------|--------------------------------|----------------------|
| 100 (2)                 | 10.1 (0.5)               | 1.59 (0.36)                    | 1.6 (0.2)            |
| 150 (15)                | 9.03 (3.09)              | 1.54 (0.43)                    | 1.9 (0.3)            |
| 200 (3)                 | 8.41 (0.62)              | 1.41 (0.22)                    | 1.9 (0.7)            |
| All (20)                | 9.04 (2.70)              | 1.52 (0.39)                    | 1.9 (0.3)            |

Concentrations expressed as carboplatin mass units.

AUC<sub>0-inf</sub> beyond the last time point sampled had a median extrapolated portion of 7.0% (range 2.7-15%).

**Suppl. Table 3. Paclitaxel PK. Mean (standard deviation) C<sub>max</sub> of paclitaxel (80 mg/m<sup>2</sup>) in presence of veliparib.**

| Veliparib Dose (mg) (N) | C <sub>max</sub> (µg/mL) | AUC <sub>0-∞</sub> (µg•h/mL) |
|-------------------------|--------------------------|------------------------------|
| 100 (2)                 | 3.04 (0.91)              | 5.33 (0.65)                  |
| 150 (17)                | 3.05 (0.66)              | 5.18 (1.10)                  |
| 200 (4)                 | 3.75 (1.21)              | 5.78 (2.10)                  |
| All (23)                | 3.17 (0.79)              | 5.30 (1.25)                  |

**Suppl.Table 4. Overview of efficacy signals observed with veliparib as single agent and phase 2 and 3 trials of combination regimens, sorted by phase and increasing veliparib dose.**

| Phase Size         | Treatment                              | Dose                                                                                                                                                       | Disease                                                                                              | Response                                                                                                                                                                                                                                             | Ref                   |
|--------------------|----------------------------------------|------------------------------------------------------------------------------------------------------------------------------------------------------------|------------------------------------------------------------------------------------------------------|------------------------------------------------------------------------------------------------------------------------------------------------------------------------------------------------------------------------------------------------------|-----------------------|
| <b>1<br/>N=62</b>  | Veliparib                              | V: 400 mg BID (RP2D)                                                                                                                                       | BRCA1/2 <sub>mut</sub> , Pt-refractory ovarian, or basal-like breast cancer BRCA <sub>wt</sub> .     | ORR 23% (BRCA <sub>mut</sub> at all dose levels)                                                                                                                                                                                                     | Puhalla NCI-8282      |
| <b>2<br/>N=50</b>  | Veliparib                              | V: 400 mg BID                                                                                                                                              | Recurrent ovarian, fallopian tube, or primary peritoneal cancer with germline BRCA1/2 <sub>mut</sub> | 26% ORR                                                                                                                                                                                                                                              | Coleman GOG-0280 [40] |
| <b>2<br/>N=116</b> | Veliparib +carboplatin +paclitaxel QW  | V: 50 mg BID<br>C: AUC=6, QW<br>P: 80 mg/m <sup>2</sup> , QW<br>vs<br>P: 80 mg/m <sup>2</sup> , QW<br><br>prior to doxorubicin (A) and cyclophosphamide(C) | Neo-adjuvant TNBC (3 biomarker driven sub-types)                                                     | V: 51%; 95%-PI, 36-66% pCR<br>Control: 26%; 95%-PI, 9-43%                                                                                                                                                                                            | Rugo I-SPY 2 [23]     |
| <b>2<br/>N=158</b> | Veliparib +carboplatin +paclitaxel Q3W | V: 120 mg BID, D 1-7<br>C: AUC=6, D1<br>P: 200 mg/m <sup>2</sup> , D1                                                                                      | 1 <sup>st</sup> line NSCLC                                                                           | V: 32.4% ORR<br>Placebo: 32.1%<br><br>V: 5.8 months median PFS<br>Placebo: 4.2 months<br>HR, 0.72; 95%-CI 0.45-1.15;<br>( <i>P</i> =0.17)<br><br>V: 11.7 months median OS<br>Placebo: 9.1 months<br>HR, 0.80; 95%-CI 0.54-1.18;<br>( <i>P</i> =0.27) | Ramalingam [54]       |
| <b>2<br/>N=284</b> | Veliparib +carboplatin +paclitaxel Q3W | V: 120 mg BID, D 1-7<br>C: AUC=6, D3<br>P: 175 mg/m <sup>2</sup> , D3                                                                                      | Recurrent/metastatic TNBC with germline BRCA1/2 <sub>mut</sub>                                       | V: 77.8% ORR<br>Placebo: 61.3%<br>( <i>P</i> = 0.027)<br><br>V: 14.1 months median PFS<br>Placebo: 12.3 months<br>HR 0.789; 95%-CI 0.536–1.162<br>( <i>P</i> = 0.227)                                                                                | Han BROCADE 2 [55]    |

|                                   |                                                                                                                     |                                                                                                                                                                                                                       |                                                                                                                                            |                                                                                                                                                                                                                                                                                                                                                                           |                                                 |
|-----------------------------------|---------------------------------------------------------------------------------------------------------------------|-----------------------------------------------------------------------------------------------------------------------------------------------------------------------------------------------------------------------|--------------------------------------------------------------------------------------------------------------------------------------------|---------------------------------------------------------------------------------------------------------------------------------------------------------------------------------------------------------------------------------------------------------------------------------------------------------------------------------------------------------------------------|-------------------------------------------------|
| <p><b>2</b><br/><b>N=320</b></p>  | <p>Veliparib<br/>+cisplatin<br/>Q3W</p>                                                                             | <p>V: 300 mg BID, D1-14<br/>Cis: 75 mg/m<sup>2</sup> D1</p>                                                                                                                                                           | <p>Biomarker panel informed BRCA-like and non-BRCA-like phenotyped recurrent/metastatic TNBC or germline <i>BRCA1/2</i><sub>mut</sub>,</p> | <p>BRCA-like<br/>V: 5.9 months median PFS<br/>Placebo: 4.2 months<br/>HR 0.57; 95%-CI 0.37-0.88<br/>(P 0.01)</p> <p><i>BRCA1/2</i><sub>mut</sub><br/>V: 6.2 months median PFS<br/>Placebo: 6.4 months<br/>HR 0.79; 95%-CI 0.38-1.67<br/>(P 0.54)</p> <p>Non-BRCA-like<br/>V: 4.0 months median PFS<br/>Placebo: 3.0 months<br/>HR 0.89; 95%-CI 0.60-1.33<br/>(P 0.57)</p> | <p>Rodler<br/>S1416<br/>[41]</p>                |
| <p><b>3</b><br/><b>N=634</b></p>  | <p>Veliparib in combination with carboplatin and paclitaxel followed by doxorubicin (A) and cyclophosphamide(C)</p> | <p>V: 50 mg BID<br/>C: AUC=6, QW<br/>P: 80 mg/m<sup>2</sup>, QW<br/>vs<br/>C: AUC=6, QW<br/>P: 80 mg/m<sup>2</sup>, QW<br/>vs<br/>P: 80 mg/m<sup>2</sup>, QW<br/>prior to doxorubicin (A) and cyclophosphamide(C)</p> | <p>Neo-adjuvant TNBC</p>                                                                                                                   | <p>VCP: 53% pCR<br/>CP: 58%<br/>P: 31%</p>                                                                                                                                                                                                                                                                                                                                | <p>Loibl<br/>BrightNess<br/>[42]</p>            |
| <p><b>3</b><br/><b>N=509</b></p>  | <p>Veliparib<br/>+carboplatin<br/>+paclitaxel<br/>QW/3W</p>                                                         | <p>V: 120 mg BID, D-2 to 5<br/>C: AUC=6, D1<br/>P: 80 mg/m<sup>2</sup>, QW</p>                                                                                                                                        | <p>Recurrent/metastatic TNBC with germline <i>BRCA1/2</i><sub>mut</sub></p>                                                                | <p>V: 75.8% ORR<br/>Placebo: 74.1%</p> <p>V: 14.5 months median PFS<br/>Placebo: 12.6 months<br/>HR 0.71; 95%-CI 0.57-0.88<br/>(P= 0.0016)</p>                                                                                                                                                                                                                            | <p>Dieras<br/>BROCADE 3<br/>[43]</p>            |
| <p><b>3</b><br/><b>N=1140</b></p> | <p>Veliparib<br/>+carboplatin<br/>+paclitaxel<br/>Q3W/QW</p>                                                        | <p>V: 150 mg BID<br/>C: AUC=6, Q3W<br/>P: 175 mg/m<sup>2</sup>, Q3W /<br/>P: 80 mg/m<sup>2</sup>, QW</p>                                                                                                              | <p>1<sup>st</sup> line stage III or IV high-grade serous ovarian</p>                                                                       | <p>V: 23.5 months median PFS<br/>Placebo: 17.3 months<br/>HR 0.68; 95%-CI 0.56-0.83<br/>(P&lt; 0.001)</p>                                                                                                                                                                                                                                                                 | <p>Coleman<br/>VELIA/<br/>GOG-3005<br/>[44]</p> |

|  |                          |  |  |                            |  |
|--|--------------------------|--|--|----------------------------|--|
|  | Veliparib<br>maintenance |  |  | V: 84% ORR<br>Placebo: 74% |  |
|--|--------------------------|--|--|----------------------------|--|
